# Supplementary material for: Prognostic significance of high GFI1 expression in AML of normal karyotype and its association with a FLT3-ITD signature
Source: PubMed Central journal article supplement (PMC5593973; doi:10.1038/s41598-017-11718-8), 2017-09-11
Supplement: 41598_2017_11718_MOESM1_ESM.pdf [file 41598_2017_11718_MOESM1_ESM.pdf]

## **Supplementary Information**

### **Prognostic significance of high GFI1 expression in AML of normal karyotype and its association with a FLT3-ITD signature**

Giacomo Volpe, David S Walton, David E Grainger, Carl Ward, Pierre Cauchy, Daniel Blakemore, Daniel J L Coleman, Peter N Cockerill, Paloma Garcia and Jon Frampton.

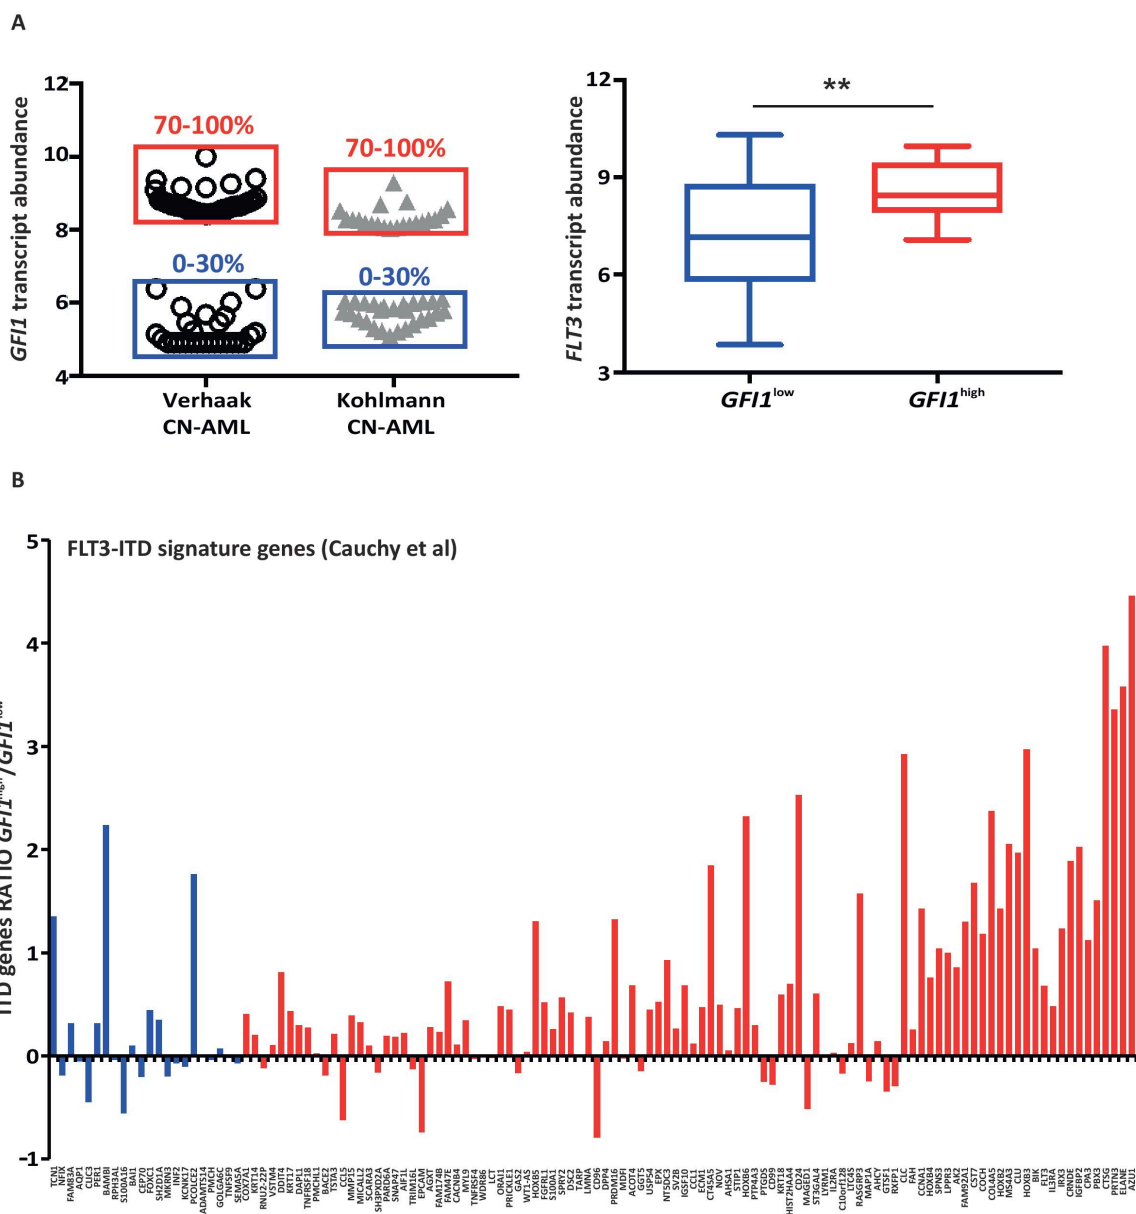

**Figure S1. Analysis of FLT3-ITD genes in an independent CN-AML dataset**

(A) Representation of the 0-30% *GFI1*<sup>low</sup> and 70-100% *GFI1*<sup>high</sup> expression boundaries comparing samples from the Verhaak et al<sup>19</sup> and the Kohlmann et al datasets. Boxplots in the right panel represent the abundance of the *FLT3* transcript in *GFI1*<sup>low</sup> versus *GFI1*<sup>high</sup> CN-AML patient samples from the Kohlmann dataset. (B) Histogram representing expression of FLT3-ITD molecular signature genes in *GFI1*<sup>high</sup> versus *GFI1*<sup>low</sup> FLT3-WT CN-AML patient samples from the Kohlmann dataset. The ranking of the genes is the same as that depicted in FIG2A.
